# Supplementary material for: Prognostic relevance of autophagy-related markers LC3, p62/sequestosome 1, Beclin-1 and ULK1 in colorectal cancer patients with respect to KRAS mutational status
Source: World J Surg Oncol. 2016 Jul 22;14:189. doi: 10.1186/s12957-016-0946-x (PMC4957418; doi:10.1186/s12957-016-0946-x)
Supplement: Additional file 2: — Raw data converted from SPSS to Excel. (XLSX 18 kb) [file 12957_2016_946_MOESM2_ESM.xlsx]

## Sheet: Sheet1
k_ras	Fall	Geschlecht	Alter	survival	T_stadium	T_Grouped	N_stadium	Grading	M_status	Beclin_nucleus_publication	Zensor_Tod	p62_cytoplasmic_publication	Beclin_cyto	p62_nucleus	LC3	ULK1	ULK_pattern	ULK_grouped
#NULL!	#NULL!		#NULL!	#NULL!	#NULL!	#NULL!	#NULL!	#NULL!	#NULL!	#NULL!	#NULL!	#NULL!	#NULL!	#NULL!	#NULL!	#NULL!	#NULL!	#NULL!
0	4	m	59	54	2	0	0	2	0	2	0	1	1	1	0	1	1	1
1	6	m	72	29	3	1	0	3	1	2	1	1	1	2	1	2	1	1
0	7	w	62	1	4	1	2	3	1	2	1	1	1	2	0	3	3	1
1	8	w	75	1	4	1	2	2	0	2	1	1	1	2	1	1	1	1
0	9	w	72	21	2	0	0	2	0	2	2	1	#NULL!	2	0	1	1	1
1	14	m	70	19	3	1	0	2	1	2	1	1	1	2	#NULL!	1	1	1
1	23	w	91	42	3	1	0	2	0	2	1	0	1	1	0	1	1	1
0	26	w	62	21	4	1	2	3	1	#NULL!	1	1	#NULL!	2	1	2	1	1
0	31	m	85	62	1	0	0	2	0	2	0	1	1	1	0	0	0	0
0	33	m	61	29	3	1	0	2	0	1	2	1	1	1	0	0	0	0
0	39	m	64	34	3	1	0	2	0	1	1	1	1	1	0	1	1	1
0	47	w	84	9	4	1	1	2	1	2	1	1	2	1	0	2	1	1
0	50	m	64	56	3	1	1	2	0	1	0	1	1	1	0	1	1	1
1	52	w	90	10	3	1	2	3	0	2	1	1	2	2	1	3	3	1
#NULL!	68	m	68	12	4	1	2	2	0	2	1	1	2	2	0	2	1	1
0	69	w	79	58	3	1	0	2	0	1	0	1	1	1	0	1	1	1
0	100	m	77	60	3	1	0	1	9	1	0	1	1	2	0	1	1	1
0	101	m	77	42	3	1	2	3	0	1	1	1	1	2	1	1	1	1
0	102	m	85	54	3	1	0	3	0	2	1	1	2	2	0	1	1	1
0	103	m	76	35	2	0	0	3	0	1	1	1	1	2	1	1	1	1
0	106	m	53	15	4	1	2	3	0	1	1	1	1	2	0	1	1	1
0	108	m	58	18	4	1	2	2	0	1	1	0	1	2	0	1	1	1
0	109	w	84	75	3	1	0	1	0	1	0	1	1	1	0	1	1	1
0	110	w	60	6	4	1	2	3	1	2	1	0	2	2	0	1	1	1
0	111	m	61	68	3	1	1	2	0	1	0	1	2	2	0	2	2	1
0	113	w	67	11	3	1	1	2	1	2	1	0	1	1	0	0	0	0
1	114	m	75	7	4	1	2	2	1	1	2	1	1	1	1	1	1	1
1	117	m	82	60	3	1	0	2	0	1	0	1	1	2	0	1	1	1
0	124	w	50	4	4	1	2	2	1	1	1	1	1	3	0	0	0	0
0	128	w	74	60	1	0	0	1	0	1	0	1	1	2	0	1	1	1
0	130	m	66	60	3	1	0	1	0	1	0	1	1	2	0	1	1	1
0	131	m	74	18	4	1	2	2	1	2	1	1	2	2	0	1	1	1
0	132	m	68	69	3	1	0	2	0	1	0	1	1	2	0	1	1	1
0	135	w	77	60	3	1	0	2	0	2	0	1	2	2	1	1	1	1
0	141	w	67	60	3	1	0	2	0	1	0	1	2	3	1	#NULL!	#NULL!	#NULL!
0	143	w	78	60	99	99	99	2	9	1	0	1	2	1	0	#NULL!	#NULL!	#NULL!
0	144	m	59	16	3	1	2	2	1	1	1	1	2	3	1	#NULL!	#NULL!	#NULL!
0	145	m	50	68	3	1	0	1	0	1	0	1	2	1	0	#NULL!	#NULL!	#NULL!
0	148	m	54	60	3	1	1	2	1	2	0	1	2	2	0	#NULL!	#NULL!	#NULL!
0	149	m	57	24	3	1	0	1	0	2	1	1	2	3	0	#NULL!	#NULL!	#NULL!
0	150	w	62	60	3	1	0	1	0	1	0	1	2	2	1	#NULL!	#NULL!	#NULL!
0	151	m	64	48	3	1	0	2	0	1	1	1	1	1	#NULL!	#NULL!	#NULL!	#NULL!
0	153	m	74	21	3	1	1	3	1	#NULL!	1	1	#NULL!	2	1	#NULL!	#NULL!	#NULL!
1	156	w	55	51	2	0	0	2	0	1	0	1	2	2	0	#NULL!	#NULL!	#NULL!
1	157	m	83	34	4	1	1	2	0	1	1	1	1	3	#NULL!	#NULL!	#NULL!	#NULL!
1	161	w	68	60	3	1	0	2	0	1	0	1	1	1	0	#NULL!	#NULL!	#NULL!
1	162	m	56	60	3	1	0	2	0	2	0	1	1	2	0	#NULL!	#NULL!	#NULL!
1	165	m	59	60	2	0	2	3	0	2	0	1	2	3	1	#NULL!	#NULL!	#NULL!
0	166	w	83	70	3	1	1	3	0	1	1	1	1	2	0	#NULL!	#NULL!	#NULL!
0	201	w	80	10	3	1	1	2	0	2	1	1	2	2	1	1	1	1
1	205	w	74	84	3	1	0	2	0	1	0	1	1	2	0	0	0	0
0	208	w	87	16	4	1	0	3	1	1	1	1	1	3	0	1	1	1
1	213	w	68	30	3	1	0	1	0	2	1	1	2	2	0	1	1	1
0	216	m	66	82	3	1	1	1	0	2	0	1	1	1	0	0	0	0
0	217	m	64	60	3	1	0	2	0	1	0	0	1	1	0	1	1	1
0	218	m	66	81	2	0	2	2	0	1	0	1	1	3	0	2	1	1
1	221	m	63	60	3	1	1	2	0	1	0	1	1	2	0	2	1	1
0	222	m	83	31	2	0	0	1	0	2	2	1	2	3	0	1	1	1
0	224	m	51	60	1	0	0	1	0	#NULL!	0	9	#NULL!	#NULL!	#NULL!	#NULL!	0	#NULL!
#NULL!	225	w	72	59	4	1	2	3	0	1	0	1	1	1	1	3	3	1
0	226	w	70	60	3	1	1	2	0	1	0	1	1	1	0	1	1	1
0	227	m	62	12	4	1	99	2	0	1	1	1	1	1	0	1	1	1
1	228	m	67	10	4	1	2	1	1	2	1	1	2	1	0	0	0	0
0	231	m	52	7	3	1	1	1	1	2	1	1	1	2	0	2	1	1
1	232	m	67	60	3	1	0	2	0	2	0	1	2	3	0	2	1	1
0	233	m	69	60	3	1	1	2	0	1	0	0	1	3	0	0	0	0
0	236	w	75	60	3	1	1	3	0	1	0	1	1	2	0	2	1	1
1	238	m	52	24	3	1	2	2	0	1	1	1	1	2	0	0	0	0
1	241	w	47	15	3	1	1	2	1	2	1	0	1	1	1	1	1	1
1	242	w	68	60	2	0	1	1	0	1	0	1	1	2	0	1	1	1
0	243	w	75	16	3	1	2	2	1	2	1	1	2	1	1	0	0	0
0	244	w	75	26	4	1	1	2	1	1	1	1	2	2	1	1	1	1
0	246	m	62	60	4	1	0	2	0	1	0	1	1	3	1	2	1	1
1	248	w	86	10	4	1	0	2	0	1	1	1	1	2	1	1	1	1
1	249	m	60	1	3	1	0	1	0	2	2	1	2	2	0	1	1	1
0	253	w	73	70	3	1	0	3	0	#NULL!	0	1	#NULL!	1	1	2	1	1
1	254	w	68	47	4	1	2	2	0	2	1	1	2	3	0	1	1	1
1	255	m	83	3	3	1	2	2	0	1	3	1	2	3	0	2	1	1
0	256	w	56	11	4	1	99	1	1	1	1	1	1	1	1	1	1	1
0	259	w	83	59	4	1	0	2	0	1	1	1	1	1	1	0	0	0
0	261	m	70	20	3	1	1	1	0	1	1	1	1	2	0	1	1	1
1	264	m	73	68	3	1	0	2	0	2	0	1	2	2	0	1	#NULL!	1
1	266	m	55	62	3	1	2	1	0	1	0	1	1	2	1	3	2	1
0	267	w	77	60	3	1	0	2	0	#NULL!	0	1	#NULL!	2	0	1	1	1
0	270	w	74	68	2	0	0	2	0	2	0	1	2	3	0	1	1	1
1	271	m	75	86	3	1	1	2	0	1	0	1	2	1	0	2	1	1
0	272	m	70	60	3	1	1	2	0	2	0	1	2	1	1	1	1	1
0	273	w	72	17	4	1	2	3	0	1	1	1	1	3	0	1	1	1
0	274	m	61	57	2	0	0	1	0	2	0	1	2	2	0	0	0	0
0	278	w	83	68	99	99	99	2	0	2	0	1	2	2	0	1	1	1
0	279	w	89	2	3	1	0	2	0	1	3	1	2	2	0	1	1	1
0	282	w	72	55	3	1	0	2	0	1	1	1	1	#NULL!	1	2	1	1
0	283	w	77	15	4	1	1	2	1	2	1	1	2	2	0	2	1	1
1	284	w	48	31	4	1	2	2	9	2	1	0	2	1	1	1	1	1
0	286	m	79	7	4	1	1	2	0	2	1	1	2	1	0	0	0	0
1	287	m	72	39	4	1	1	2	0	2	1	1	2	2	0	2	1	1
0	288	m	61	76	1	0	0	2	0	2	0	1	2	2	0	1	1	1
0	292	m	44	60	3	1	2	2	0	2	0	1	2	2	0	2	1	1
0	296	m	69	60	3	1	0	1	0	2	0	0	2	1	0	1	1	1
0	297	m	61	60	2	0	2	1	0	2	0	1	2	1	0	2	2	1
0	298	w	66	0	4	1	2	3	1	#NULL!	2	1	#NULL!	1	1	3	3	1
0	299	m	72	60	3	1	0	2	0	2	0	1	2	2	1	2	1	1
0	300	m	65	60	3	1	0	2	0	2	0	1	2	3	1	1	1	1
0	301	m	66	77	3	1	0	1	0	2	0	1	2	1	0	1	1	1
1	401	w	77	17	3	1	2	2	0	1	1	1	1	1	0	1	1	1
0	402	w	60	60	3	1	0	2	0	2	0	1	2	2	0	1	1	1
0	403	m	61	41	3	1	2	1	0	1	1	1	1	1	0	0	0	0
0	406	w	72	61	3	1	0	1	1	1	0	1	1	1	0	1	1	1
0	407	m	83	3	4	1	2	3	1	#NULL!	1	1	#NULL!	2	1	1	1	1
0	408	m	56	82	3	1	0	1	0	2	0	1	2	3	0	1	1	1
1	409	w	72	68	3	1	2	3	0	1	0	0	1	1	0	0	0	0
0	414	w	52	9	3	1	2	1	1	#NULL!	1	0	#NULL!	1	0	0	0	0
0	416	w	54	26	3	1	0	1	0	1	1	0	1	1	0	1	1	1
0	419	m	48	27	3	1	0	2	0	2	1	1	2	2	0	1	1	1
0	420	w	69	76	3	1	1	3	1	#NULL!	0	1	#NULL!	2	0	0	0	0
0	421	m	52	92	3	1	2	2	0	1	0	0	1	2	0	0	0	0
0	423	w	78	60	3	1	0	2	0	1	0	1	1	1	0	0	0	0
1	424	w	63	11	4	1	2	1	0	2	1	1	2	2	1	1	1	1
0	425	w	57	9	2	0	2	3	0	#NULL!	1	1	#NULL!	2	0	2	2	1
0	426	w	71	84	3	1	0	3	0	1	0	1	2	1	0	1	1	1
1	427	w	70	61	3	1	0	3	1	1	0	1	1	2	1	1	1	1
1	428	w	82	60	3	1	0	1	0	1	0	1	1	2	0	1	1	1
0	431	w	39	8	4	1	2	2	0	1	1	0	1	1	0	0	0	#NULL!
0	433	m	75	1	3	1	2	3	1	1	1	0	1	2	0	0	0	0
0	436	w	74	21	4	1	2	3	0	2	1	1	1	3	1	2	1	1
0	437	m	68	63	3	1	0	1	9	1	0	1	2	1	1	3	3	1
0	440	w	61	89	3	1	1	1	0	#NULL!	0	1	1	1	0	0	0	0
